# Supplementary material for: Determination of methyl parathion by solid-phase extraction on an ionic liquid–carbon nanotube composite electrode
Source: Royal Society of Chemistry journal article supplement (doi:10.1039/c4ay01062k), 2014-06-04

**Figure captions**

**Fig. S1.** Separation of the MP peaks by the self-correcting algorithm at the presence of (A) 5-fold p-nitroaniline and (B) 10-fold p-nitrophenol.  $P_{MP}$ ,  $P_1$  and  $P_2$  are the original peaks obtained by LSV.  $P_{MP}'$ ,  $P_1'$  and  $P_2'$  are the peaks acquired using the algorithm.

**Fig. S1.**

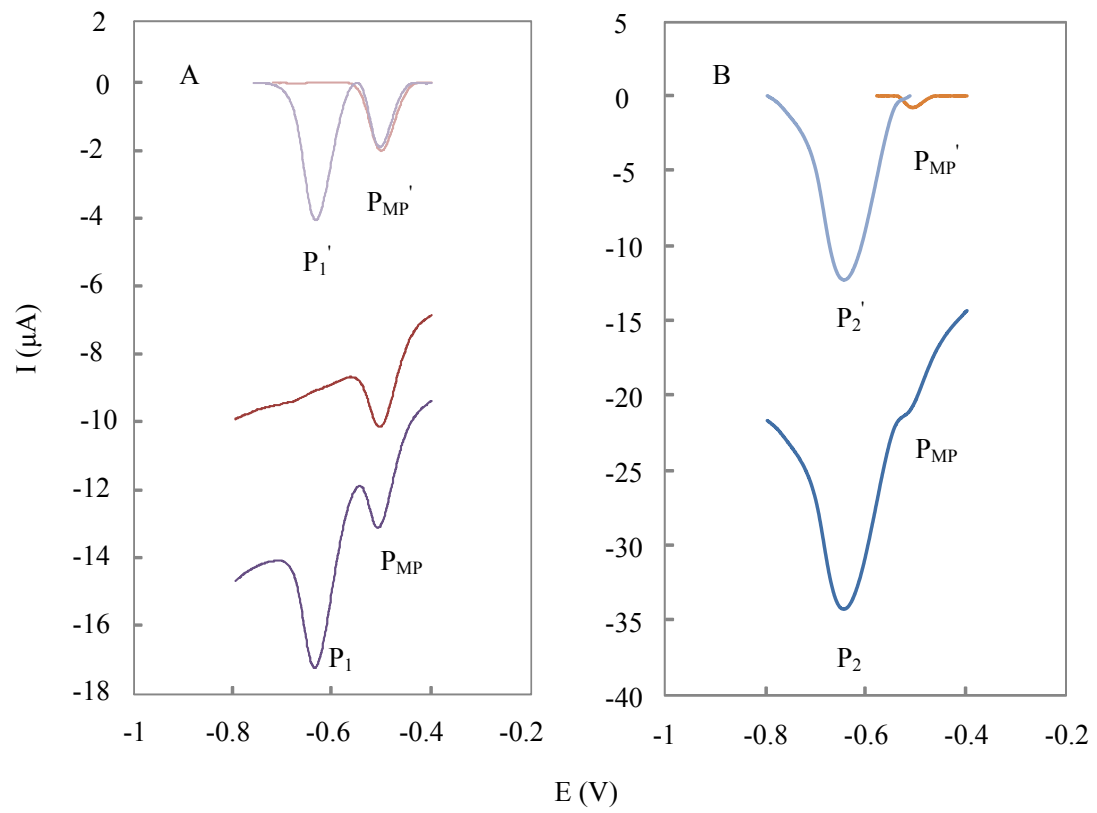

Supplement: c4ay01062k1.pdf [file c4ay01062k1.pdf]
